# Supplementary material for: Longitudinal study of humoral immunity to bovine coronavirus, virus shedding, and treatment for bovine respiratory disease in pre-weaned beef calves
Source: BMC Vet Res. 2019 May 22;15:161. doi: 10.1186/s12917-019-1887-8 (PMC6532244; doi:10.1186/s12917-019-1887-8)
Supplement: Supplementary file 1 — Bovine respiratory disease cases. (XLS 29 kb) [file 12917_2019_1887_MOESM1_ESM.xls]

## Sheet: Sheet1
Additional file 1: Bovine respiratory disease cases
Animal ID	Herd	Treatment Date	Age (days)	Breeding Group	Samples Collected
20161969	1	2016-07-11	59	NA	No
20162360	2	2016-07-19	108	3	No
MT-1	2	2016-08-05	mean = 94	1	YES
20162846	2	2016-08-10	79	2	No
20162716	2	2016-08-10	103	2	No
20162704	2	2016-08-10	105	2	No
20162820	2	2016-08-10	85	2	No
20162418	2	2016-08-10	124	2	No
20162574	2	2016-08-10	116	2	No
MT-2	2	2016-08-12	mean = 113	2	YES
20162761	2	2016-08-18	104	3	No
20162578	2	2016-08-18	125	3	No
20162601	2	2016-08-18	122	3	No
20162371	2	2016-08-18	137	3	No
20161830	1	2016-08-25	123	NA	No
Abbreviations: NA, not applicable; MT-1, mass treatment 1; MT-2, mass treatment 2
				average age at mass medication
				median
				min
				max
				STDEV
